# Supplementary material for: Characterization of the Newly Established Homoharringtonine- (HHT-) Resistant Cell Lines and Mechanisms of Resistance
Source: Hindawi journal article supplement (doi:10.1155/2022/2813938), 2022-08-30
Supplement: f1 [file 2813938.f1.pdf]

# Supplementary Figure legends

Figure.S1

A

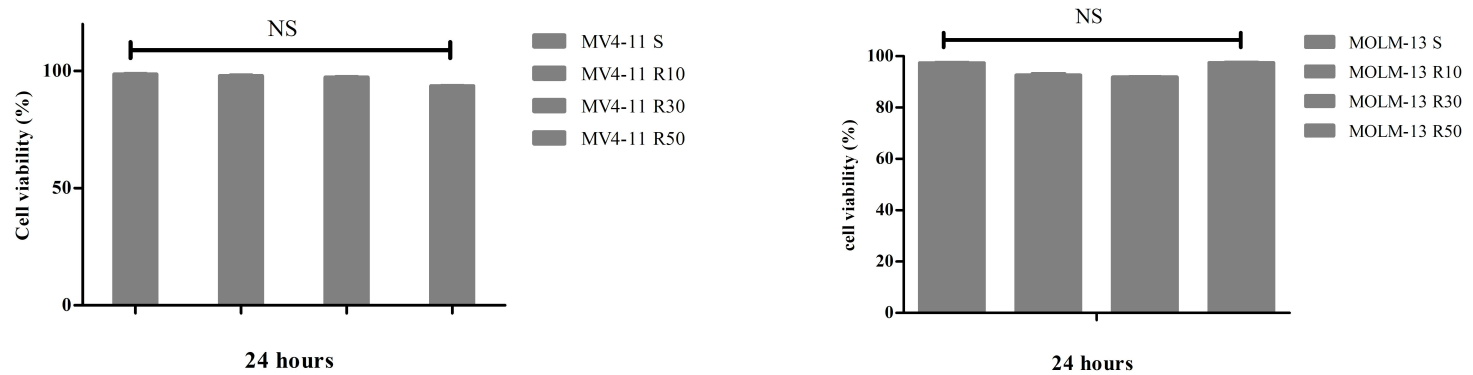

B

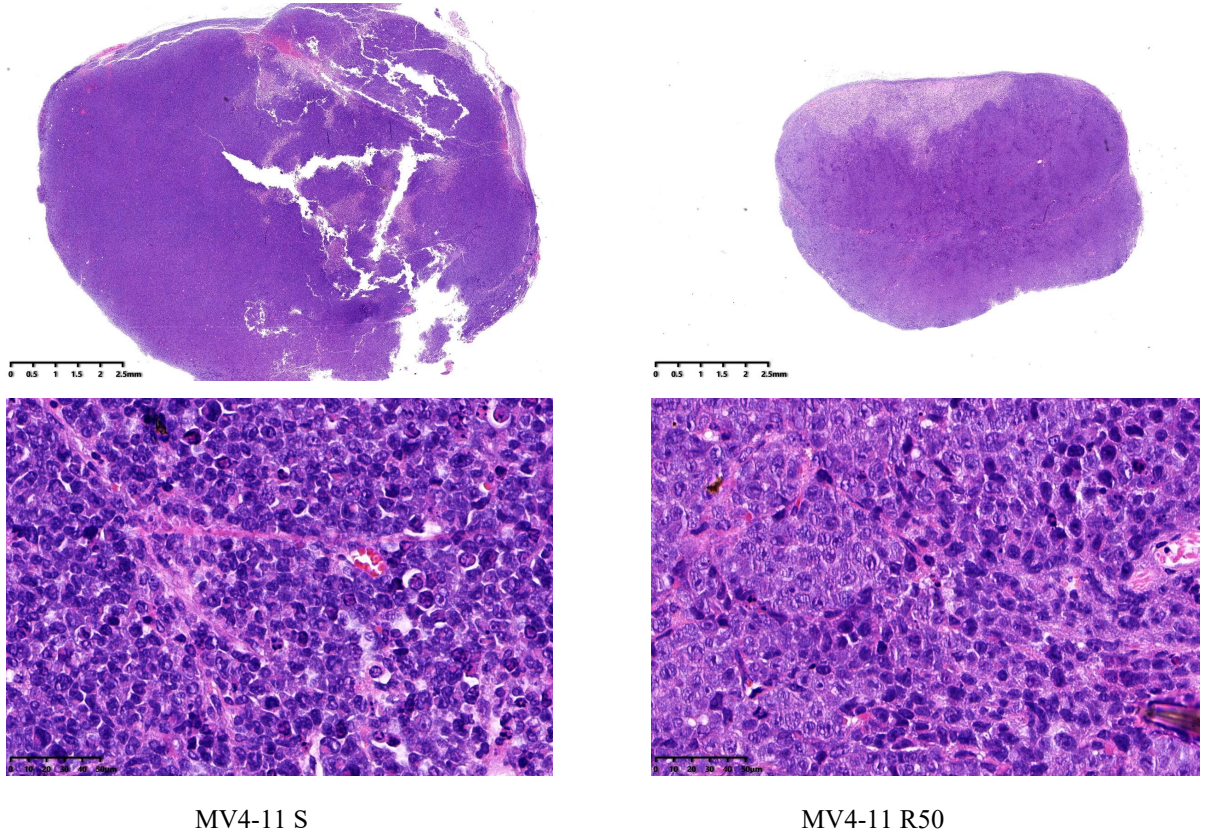

C

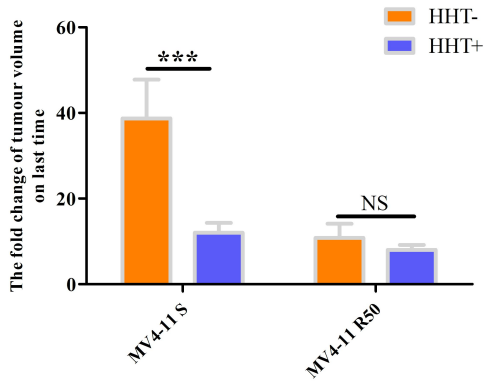

Figure.S2

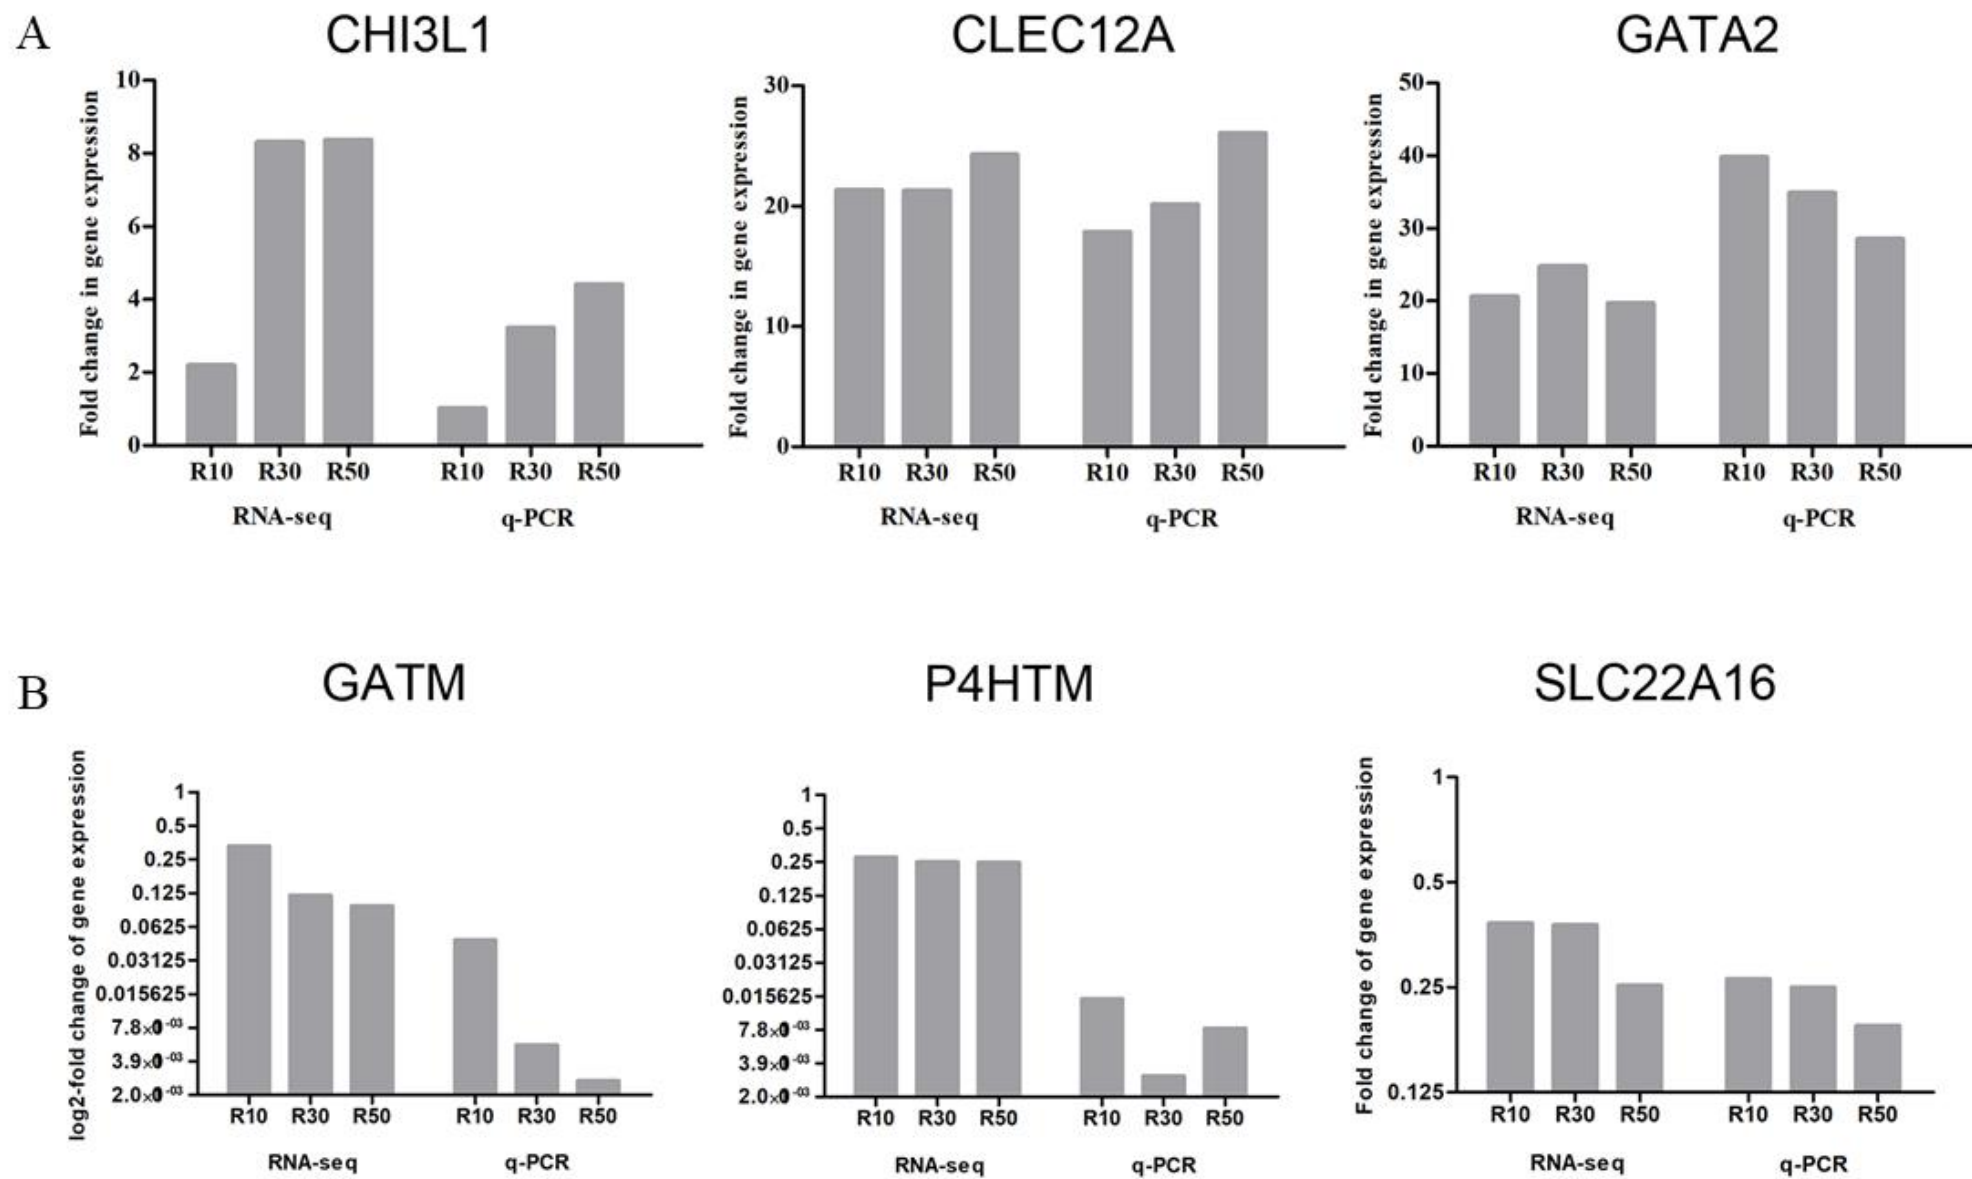

Figure.S3

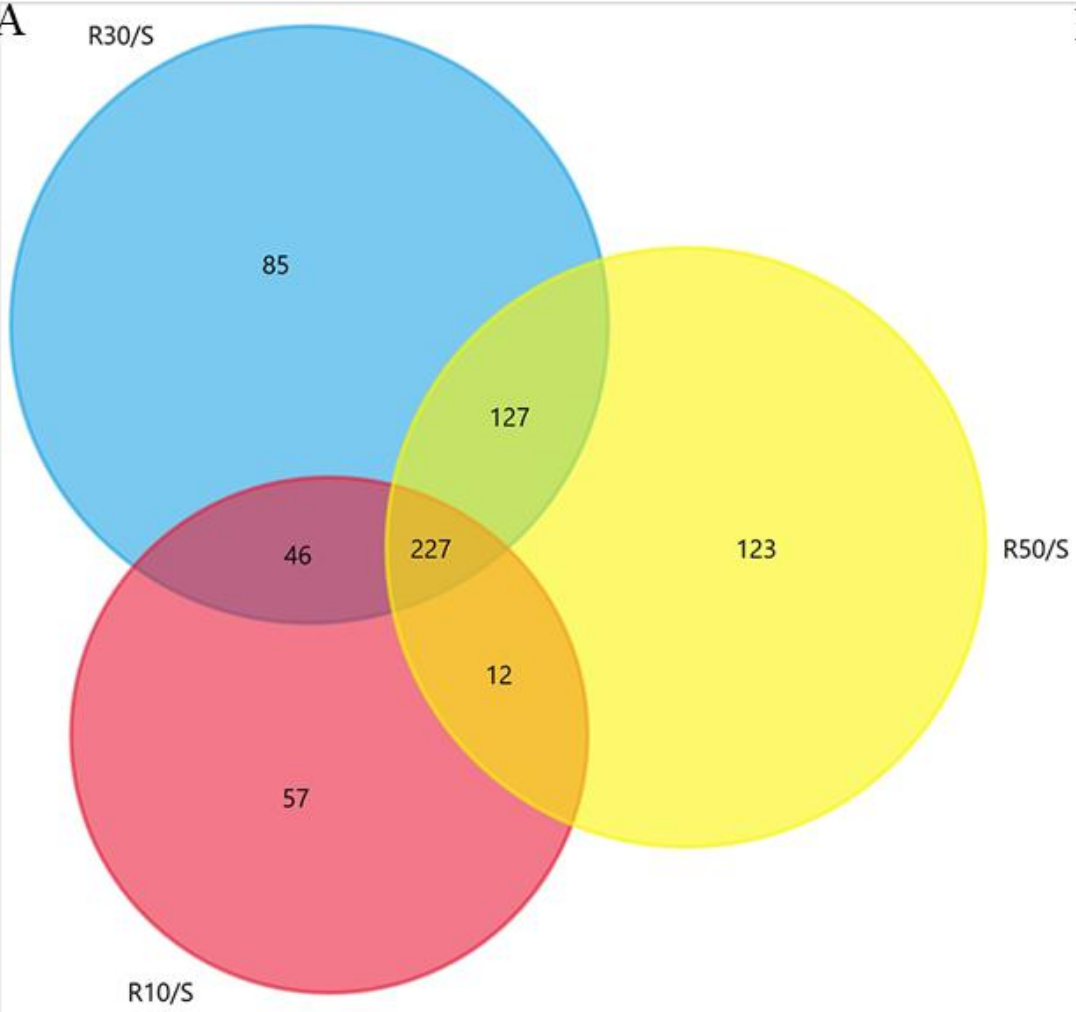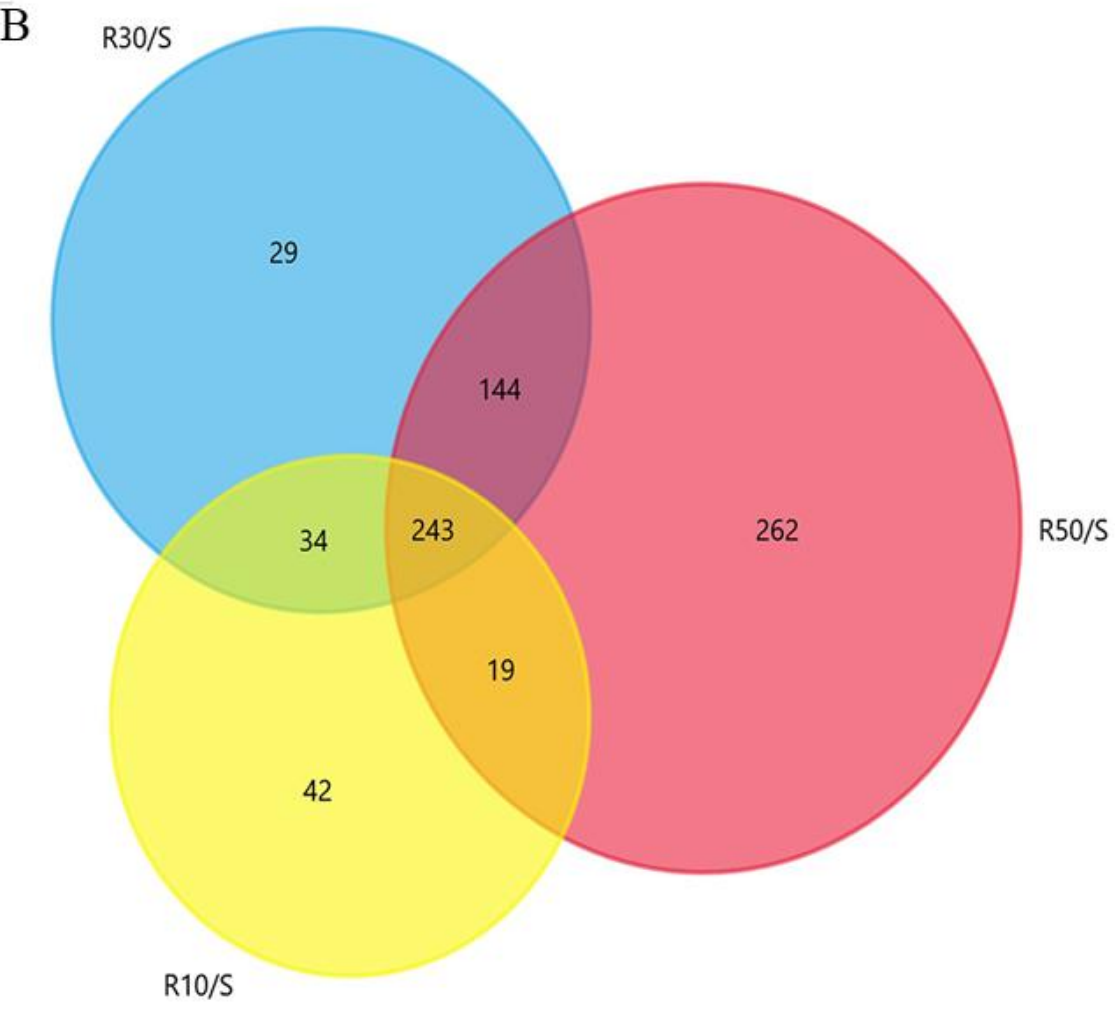

Figure.S4

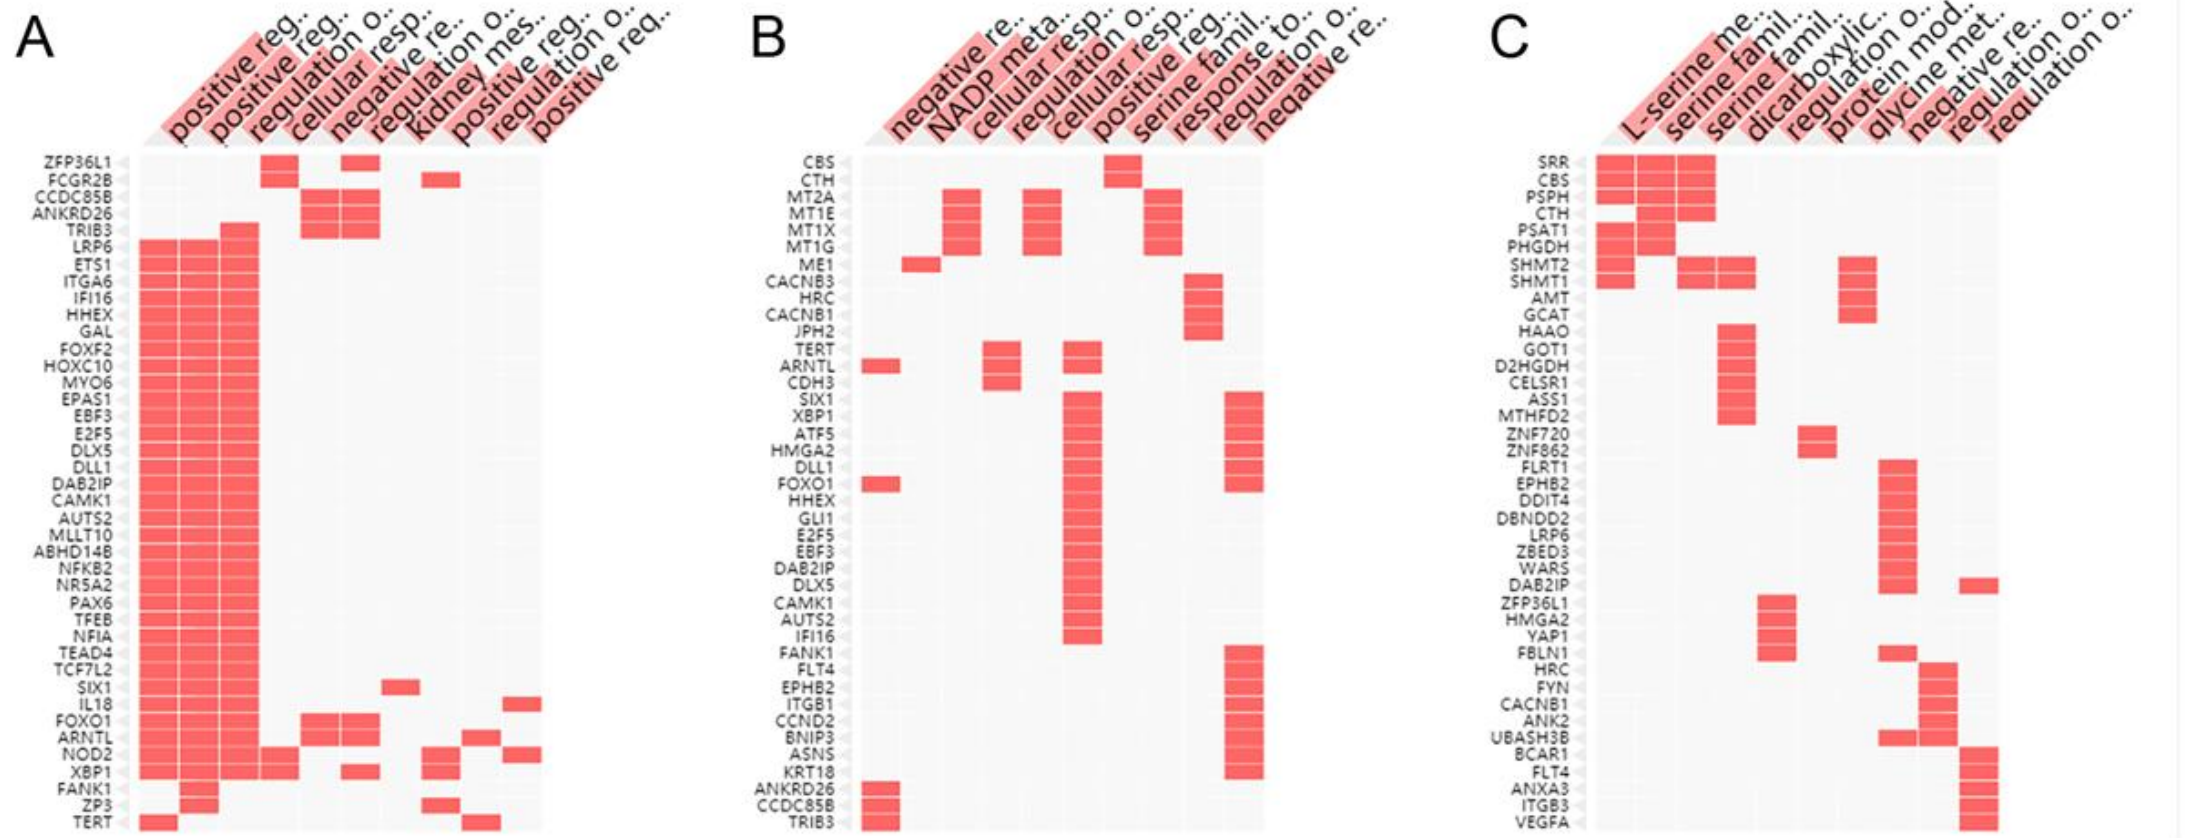

| Term                                                                              | P-value  |
|-----------------------------------------------------------------------------------|----------|
| positive regulation of transcription from RNA polymerase II promoter (GO:0045944) | 7.93E-06 |
| positive regulation of transcription, DNA-templated (GO:0045893)                  | 3.51E-05 |
| regulation of transcription from RNA polymerase II promoter (GO:0006357)          | 4.31E-05 |
| cellular response to peptide (GO:1901653)                                         | 6.08E-05 |
| negative regulation of fat cell differentiation (GO:0045599)                      | 1.85E-04 |
| regulation of fat cell differentiation (GO:0045598)                               | 2.13E-04 |
| kidney mesenchyme development (GO:0072074)                                        | 2.52E-04 |
| positive regulation of immune response (GO:0050778)                               | 2.91E-04 |
| regulation of hair cycle (GO:0042634)                                             | 3.73E-04 |
| positive regulation of type 2 immune response (GO:0002830)                        | 5.26E-04 |

| Term                                                                              | P-value  |
|-----------------------------------------------------------------------------------|----------|
| negative regulation of fat cell differentiation (GO:0045599)                      | 6.88E-04 |
| NADP metabolic process (GO:0006739)                                               | 7.49E-04 |
| cellular response to zinc ion (GO:0071294)                                        | 7.49E-04 |
| regulation of hair cycle (GO:0042634)                                             | 8.59E-04 |
| cellular response to copper ion (GO:0071280)                                      | 0.001117 |
| positive regulation of transcription from RNA polymerase II promoter (GO:0045944) | 0.001671 |
| serine family amino acid biosynthetic process (GO:0009070)                        | 0.002140 |
| response to copper ion (GO:0046688)                                               | 0.002199 |
| regulation of calcium ion transmembrane transporter activity (GO:1901019)         | 0.002944 |
| negative regulation of apoptotic process (GO:0043066)                             | 0.003428 |

| Term                                                                      | P-value  |
|---------------------------------------------------------------------------|----------|
| L-serine metabolic process (GO:0006563)                                   | 1.32E-08 |
| serine family amino acid biosynthetic process (GO:0009070)                | 3.08E-08 |
| serine family amino acid metabolic process (GO:0009069)                   | 6.52E-07 |
| dicarboxylic acid metabolic process (GO:0043648)                          | 2.31E-05 |
| regulation of stem cell proliferation (GO:0072091)                        | 1.32E-04 |
| protein modification by small protein conjugation or removal (GO:0070647) | 1.36E-04 |
| glycine metabolic process (GO:0006544)                                    | 2.21E-04 |
| negative regulation of protein phosphorylation (GO:0001933)               | 3.23E-04 |
| regulation of calcium ion transmembrane transport (GO:1903169)            | 4.18E-04 |
| regulation of endothelial cell migration (GO:0010594)                     | 4.64E-04 |

Figure.S5

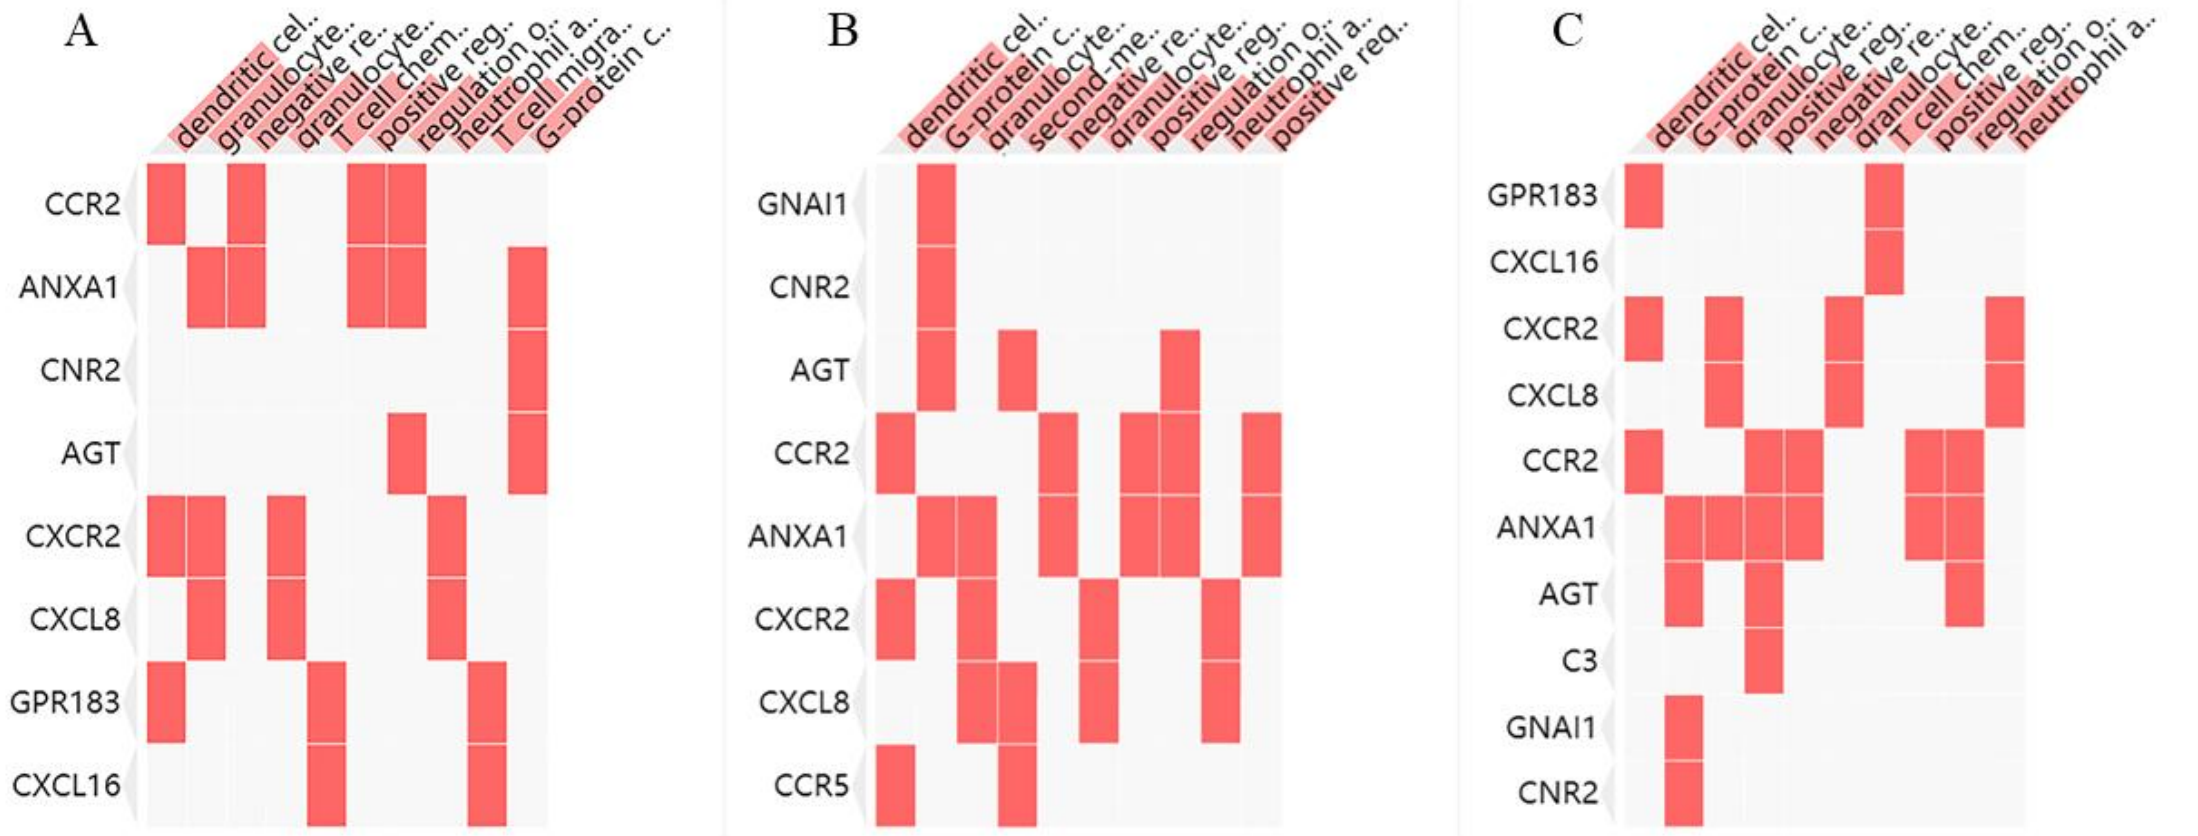

| Term                                                                                                     | P-value  |
|----------------------------------------------------------------------------------------------------------|----------|
| dendritic cell chemotaxis (GO:0002407)                                                                   | 5.02E-08 |
| granulocyte chemotaxis (GO:0071621)                                                                      | 2.46E-06 |
| negative regulation of type 2 immune response (GO:0002829)                                               | 4.72E-06 |
| granulocyte activation (GO:0036230)                                                                      | 8.08E-06 |
| T cell chemotaxis (GO:0010818)                                                                           | 1.01E-05 |
| positive regulation of T-helper 1 type immune response (GO:0002827)                                      | 1.48E-05 |
| regulation of cytokine production (GO:0001817)                                                           | 1.79E-05 |
| neutrophil activation (GO:0042119)                                                                       | 2.04E-05 |
| T cell migration (GO:0072678)                                                                            | 2.69E-05 |
| G-protein coupled receptor signaling pathway, coupled to cyclic nucleotide second messenger (GO:0007187) | 2.77E-05 |

| Term                                                                                                     | P-value  |
|----------------------------------------------------------------------------------------------------------|----------|
| dendritic cell chemotaxis (GO:0002407)                                                                   | 5.02E-08 |
| G-protein coupled receptor signaling pathway, coupled to cyclic nucleotide second messenger (GO:0007187) | 2.97E-07 |
| granulocyte chemotaxis (GO:0071621)                                                                      | 2.46E-06 |
| second-messenger-mediated signaling (GO:0019932)                                                         | 3.35E-06 |
| negative regulation of type 2 immune response (GO:0002829)                                               | 4.72E-06 |
| granulocyte activation (GO:0036230)                                                                      | 8.08E-06 |
| positive regulation of T-helper 1 type immune response (GO:0002827)                                      | 1.48E-05 |
| regulation of cytokine production (GO:0001817)                                                           | 1.79E-05 |
| neutrophil activation (GO:0042119)                                                                       | 2.04E-05 |
| positive regulation of interleukin-2 production (GO:0032743)                                             | 4.25E-05 |

| Term                                                                                                     | P-value  |
|----------------------------------------------------------------------------------------------------------|----------|
| dendritic cell chemotaxis (GO:0002407)                                                                   | 5.02E-08 |
| G-protein coupled receptor signaling pathway, coupled to cyclic nucleotide second messenger (GO:0007187) | 2.97E-07 |
| granulocyte chemotaxis (GO:0071621)                                                                      | 2.46E-06 |
| positive regulation of cytokine production (GO:0001819)                                                  | 2.84E-06 |
| negative regulation of type 2 immune response (GO:0002829)                                               | 4.72E-06 |
| granulocyte activation (GO:0036230)                                                                      | 8.08E-06 |
| T cell chemotaxis (GO:0010818)                                                                           | 1.01E-05 |
| positive regulation of T-helper 1 type immune response (GO:0002827)                                      | 1.48E-05 |
| regulation of cytokine production (GO:0001817)                                                           | 1.79E-05 |
| neutrophil activation (GO:0042119)                                                                       | 2.04E-05 |

Figure.S6

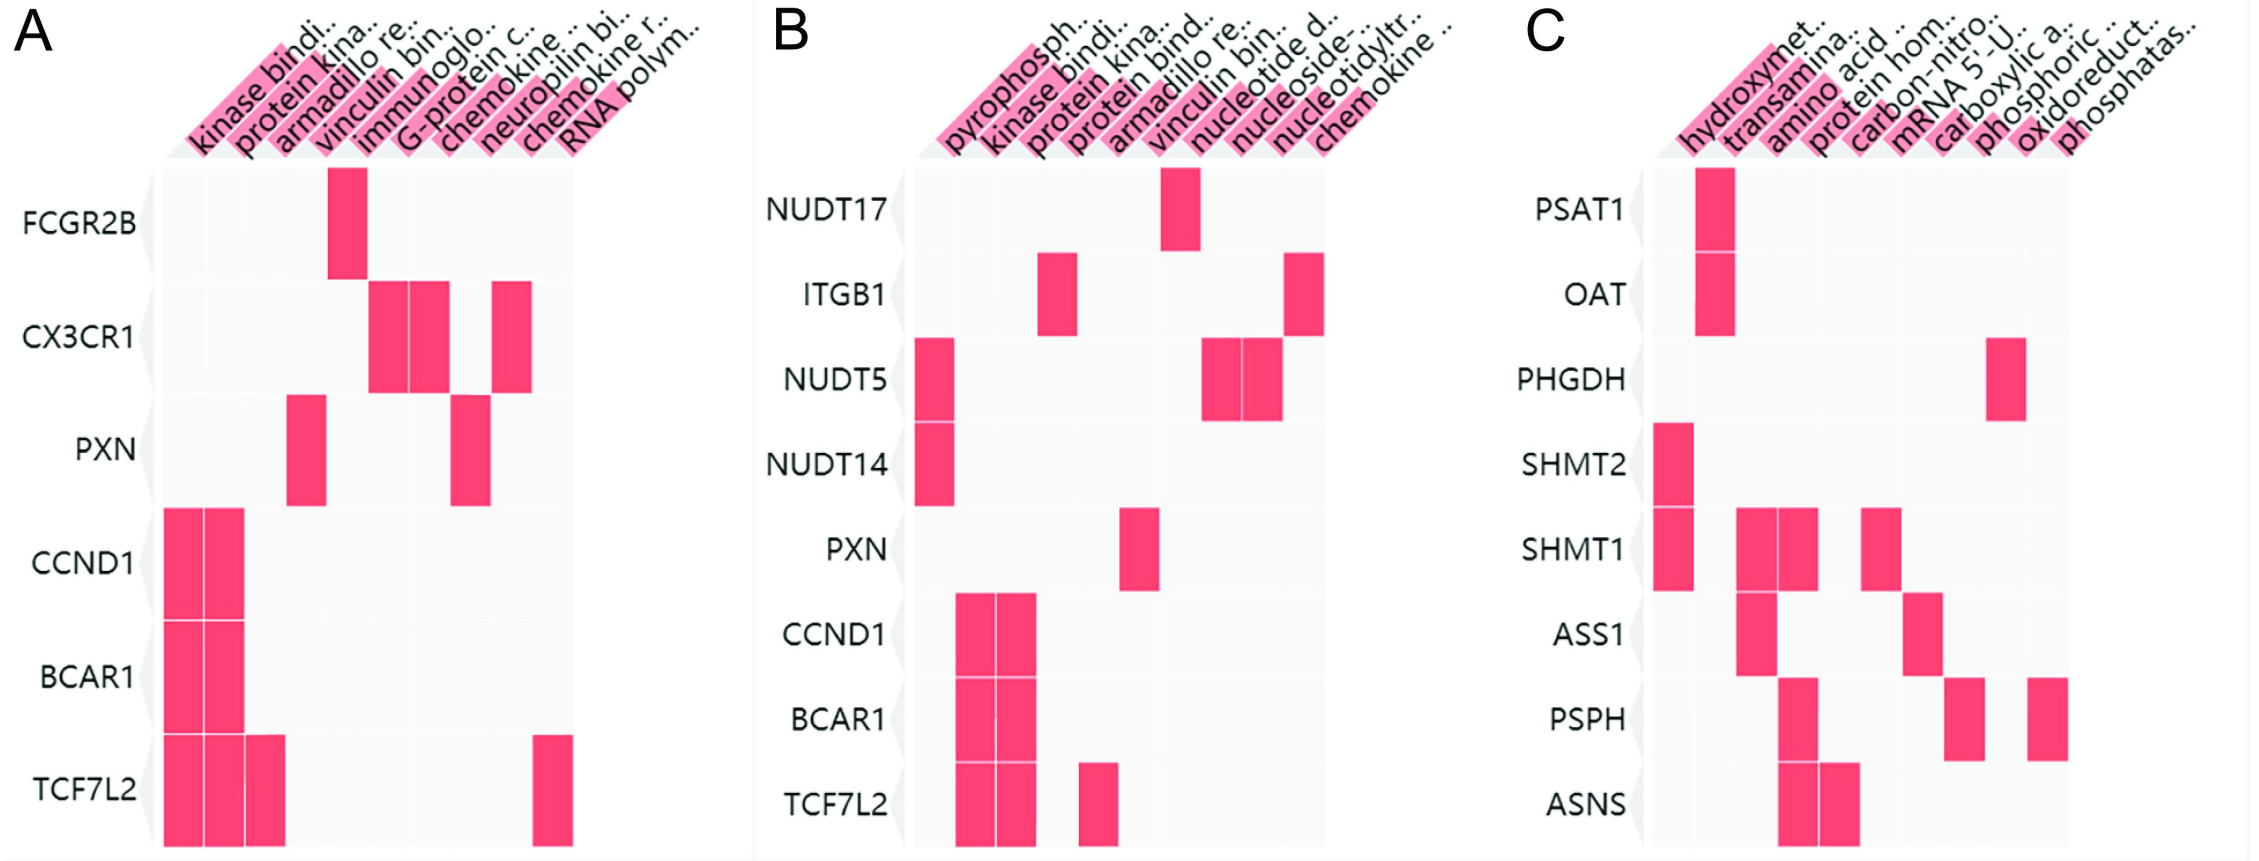

| Term                                                                   | P-value  |
|------------------------------------------------------------------------|----------|
| kinase binding (GO:0019900)                                            | 9.75E-04 |
| protein kinase binding (GO:0019901)                                    | 0.001588 |
| armadillo repeat domain binding (GO:0070016)                           | 0.004492 |
| vinculin binding (GO:0017166)                                          | 0.004990 |
| immunoglobulin binding (GO:0019865)                                    | 0.005488 |
| G-protein coupled chemoattractant receptor activity (GO:0001637)       | 0.007476 |
| chemokine binding (GO:0019956)                                         | 0.008469 |
| neuropilin binding (GO:0038191)                                        | 0.009462 |
| chemokine receptor activity (GO:0004950)                               | 0.010453 |
| RNA polymerase II repressing transcription factor binding (GO:0001103) | 0.013915 |

| Term                                                          | P-value  |
|---------------------------------------------------------------|----------|
| pyrophosphatase activity (GO:0016462)                         | 1.83E-04 |
| kinase binding (GO:0019900)                                   | 9.75E-04 |
| protein kinase binding (GO:0019901)                           | 0.001588 |
| protein binding involved in cell-matrix adhesion (GO:0098634) | 0.003495 |
| armadillo repeat domain binding (GO:0070016)                  | 0.004492 |
| vinculin binding (GO:0017166)                                 | 0.004990 |
| nucleotide diphosphatase activity (GO:0004551)                | 0.005488 |
| nucleoside-diphosphatase activity (GO:0017110)                | 0.006482 |
| nucleotidyltransferase activity (GO:0016779)                  | 0.007973 |
| chemokine binding (GO:0019956)                                | 0.008469 |

| Term                                                                                               | P-value  |
|----------------------------------------------------------------------------------------------------|----------|
| hydroxymethyl-, formyl- and related transferase activity (GO:0016742)                              | 3.37E-06 |
| transaminase activity (GO:0008483)                                                                 | 2.04E-05 |
| amino acid binding (GO:0016597)                                                                    | 1.65E-04 |
| protein homodimerization activity (GO:0042803)                                                     | 0.003671 |
| carbon-nitrogen ligase activity, with glutamine as amido-N-donor (GO:0016884)                      | 0.004990 |
| mRNA 5'-UTR binding (GO:0048027)                                                                   | 0.010949 |
| carboxylic acid binding (GO:0031406)                                                               | 0.016874 |
| phosphoric ester hydrolase activity (GO:0042578)                                                   | 0.027656 |
| oxidoreductase activity, acting on the CH-OH group of donors, NAD or NADP as acceptor (GO:0016616) | 0.043148 |
| phosphatase activity (GO:0016791)                                                                  | 0.050811 |

# Supplementary materials



# Cell cycle

MOLM-13 S

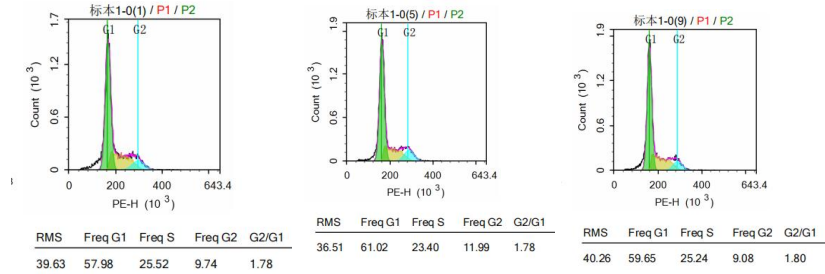

MV4-11 S

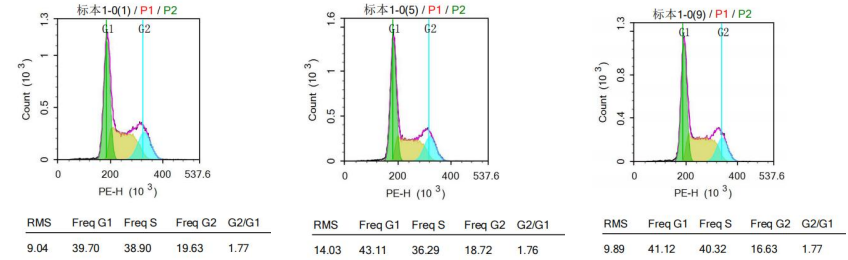

MOLM-13 R10

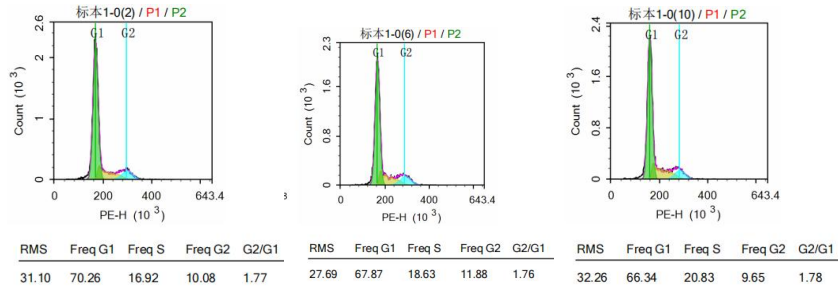

MV4-11 R10

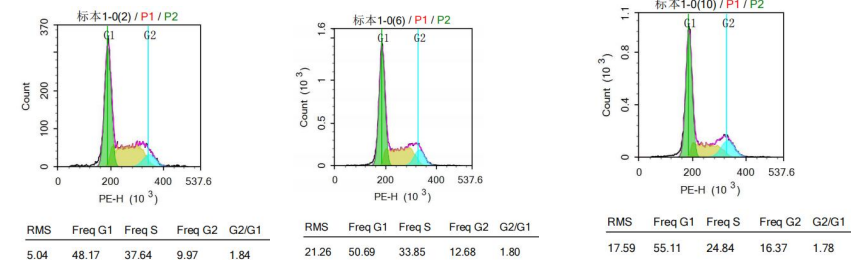

MOLM-13 R30

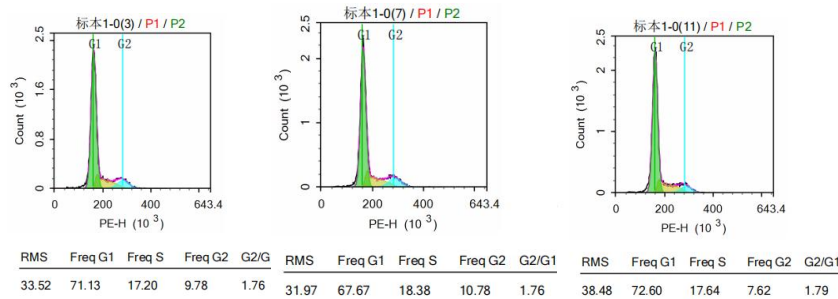

MV4-11 R30

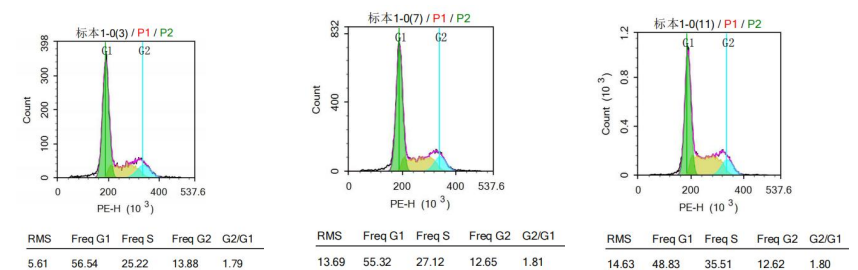

MOLM-13 R50

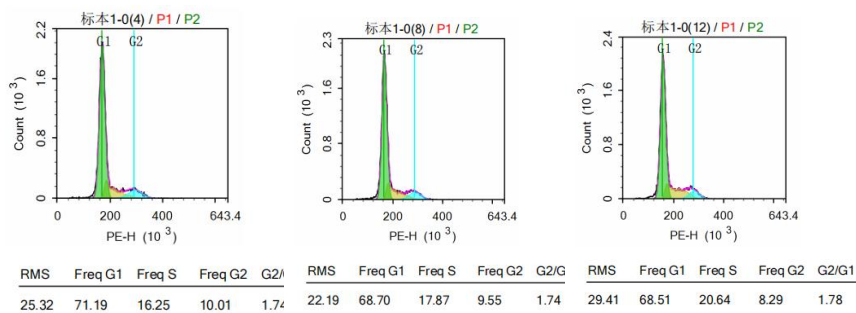

MV4-11 R50

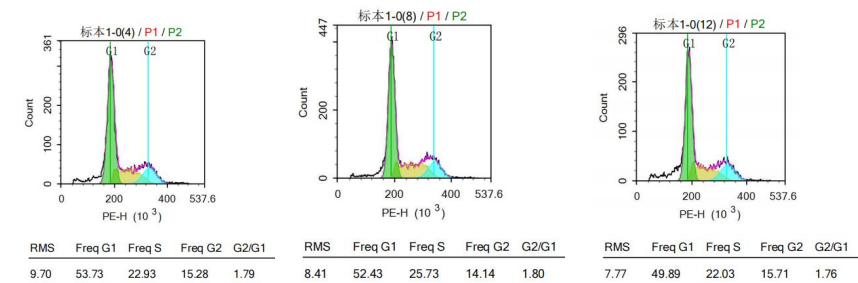

# Apoptosis

MOLM-13 S

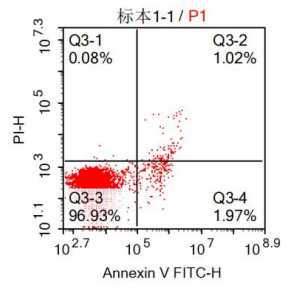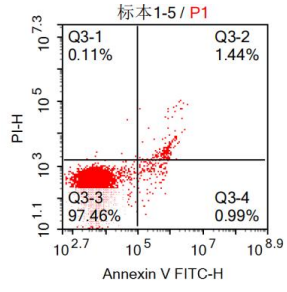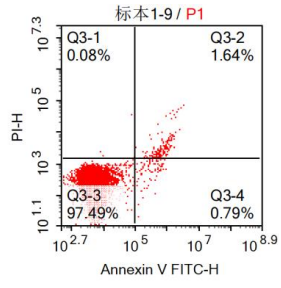

MV4-11 S

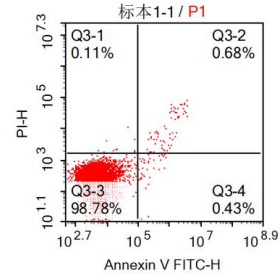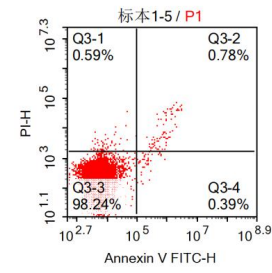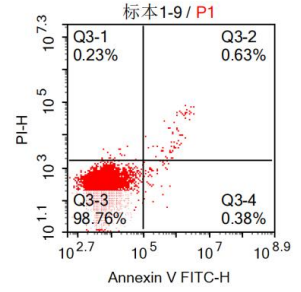

MOLM-13 R10

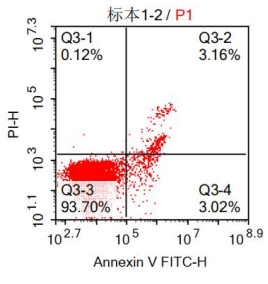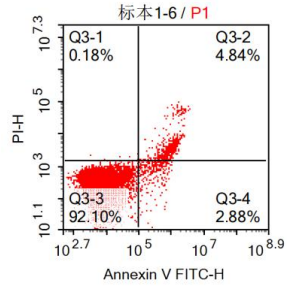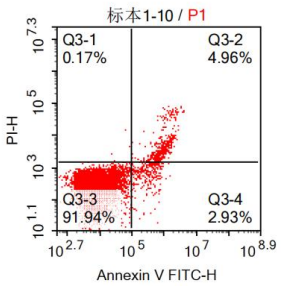

MV4-11 R10

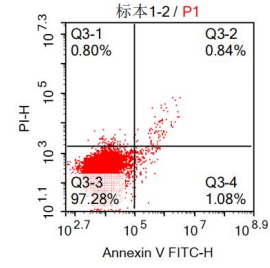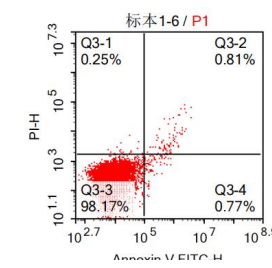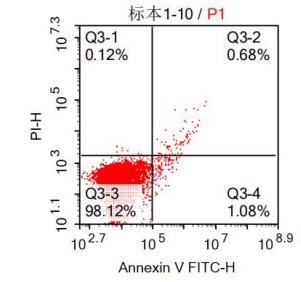

MOLM-13 R30

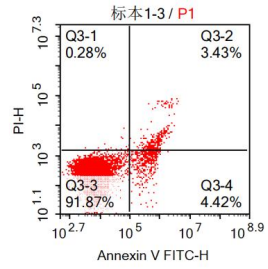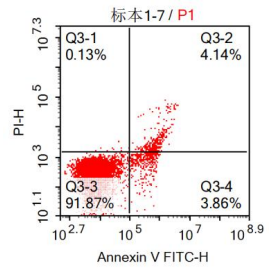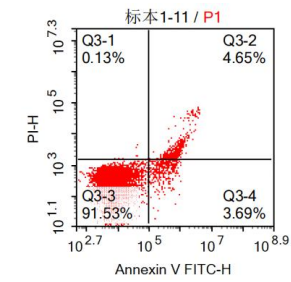

MV4-11 R30

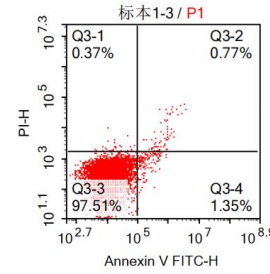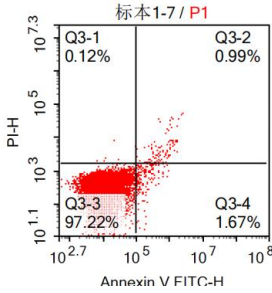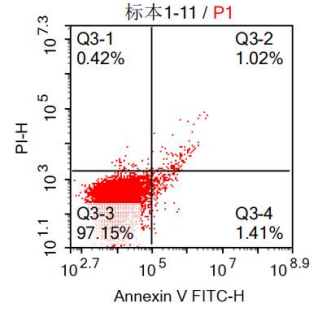

MOLM-13 R50

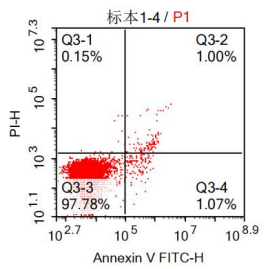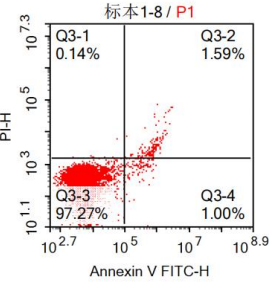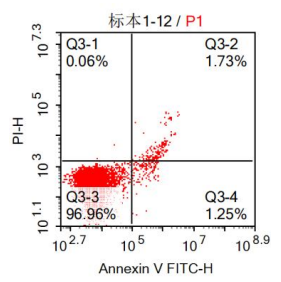

MV4-11 R50

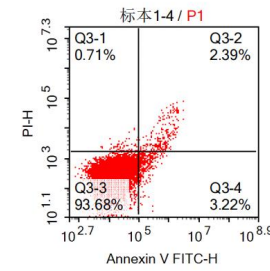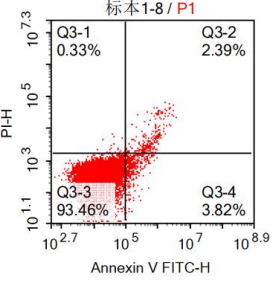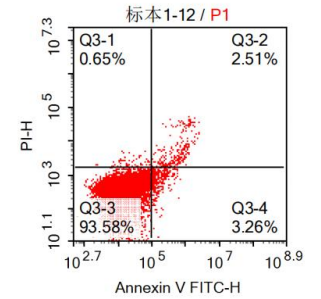

WB: mice tumour

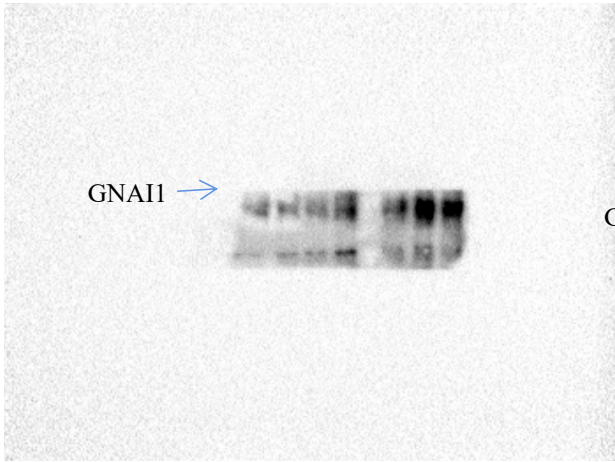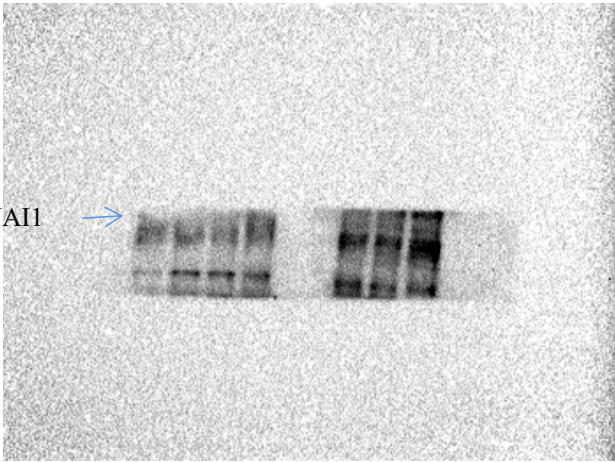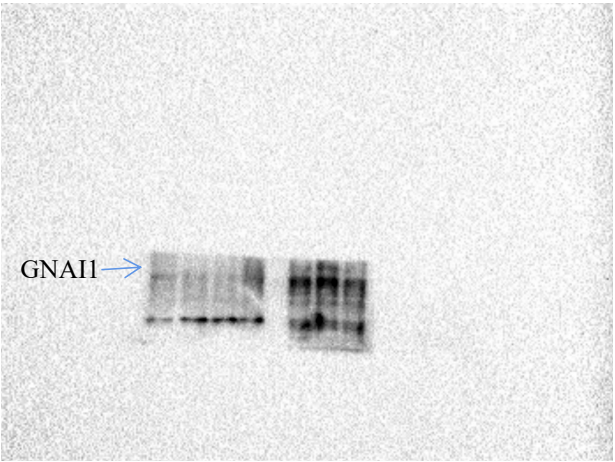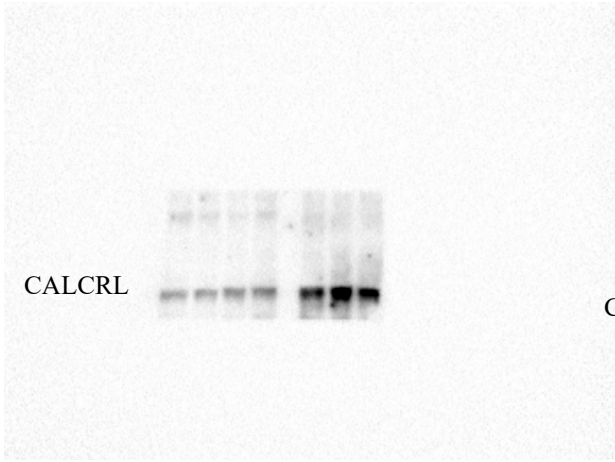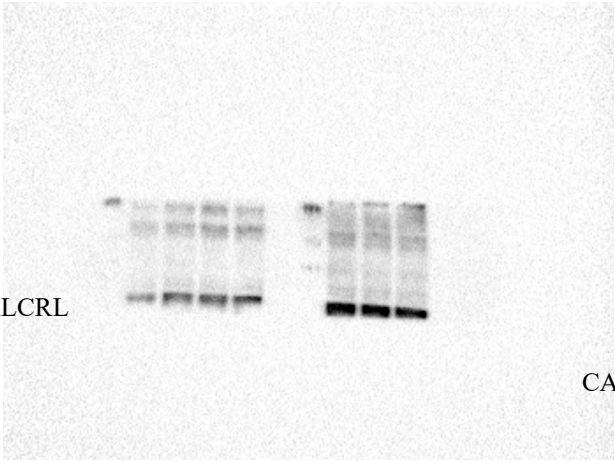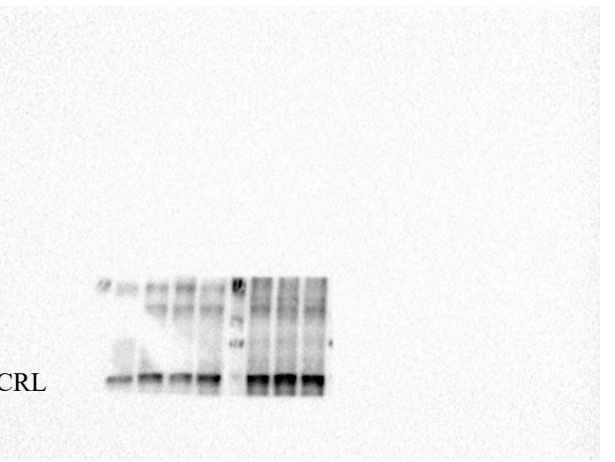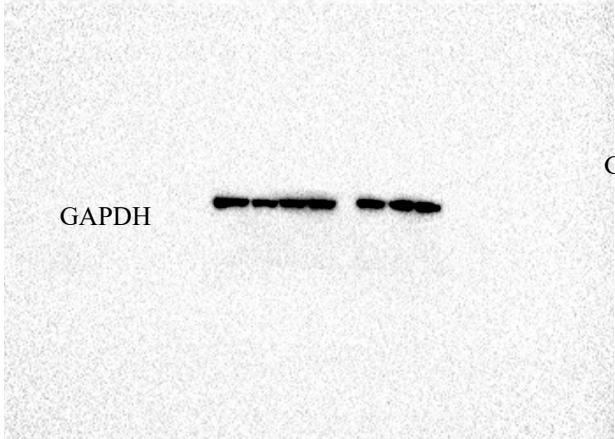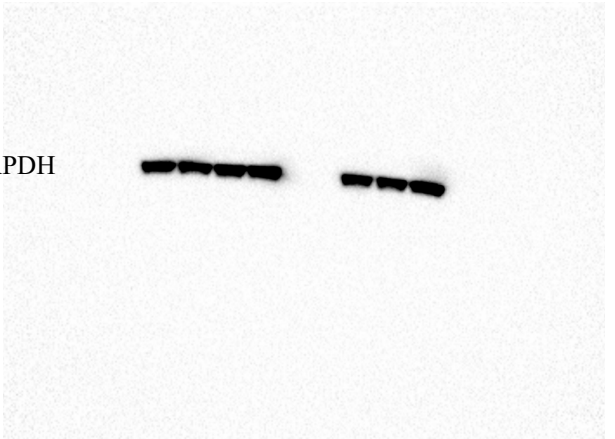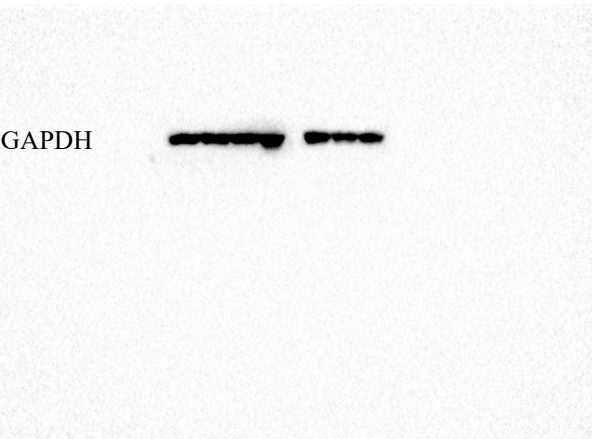

WB: cell lines

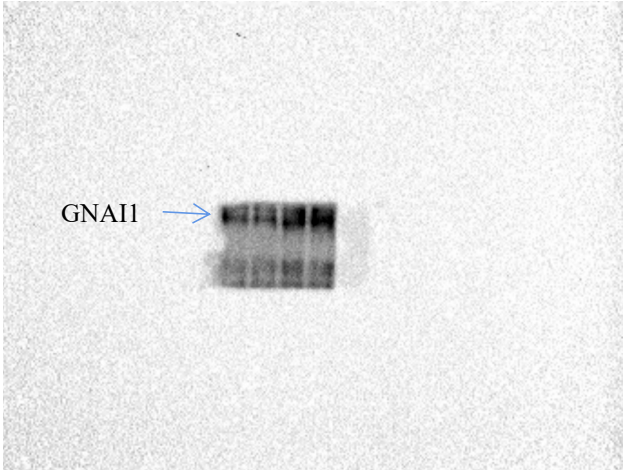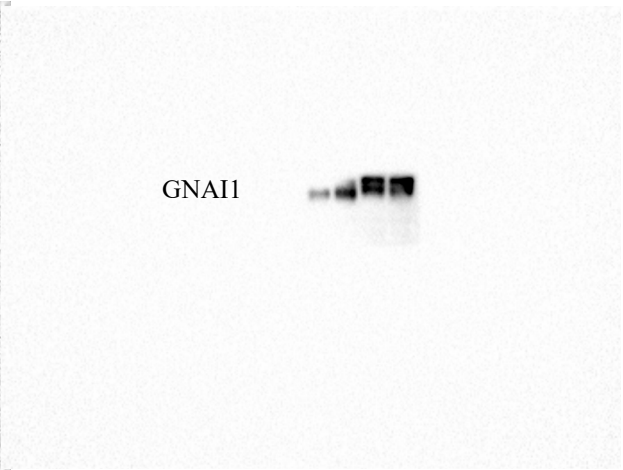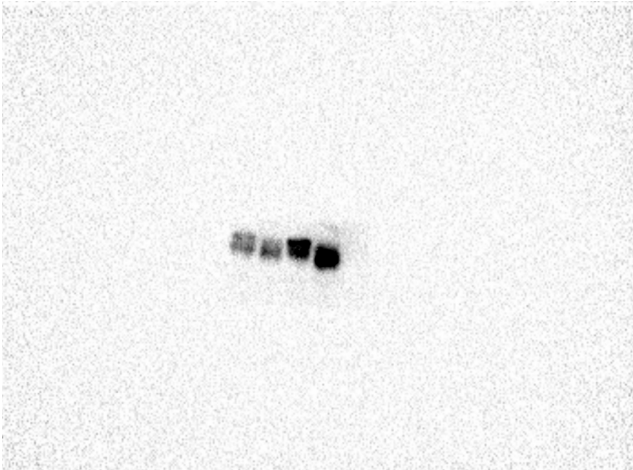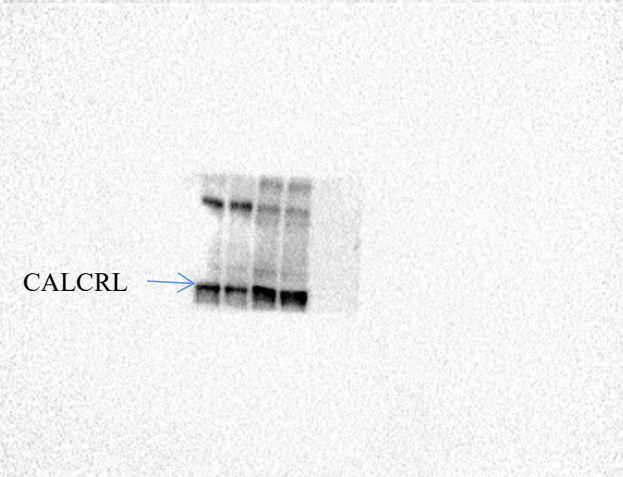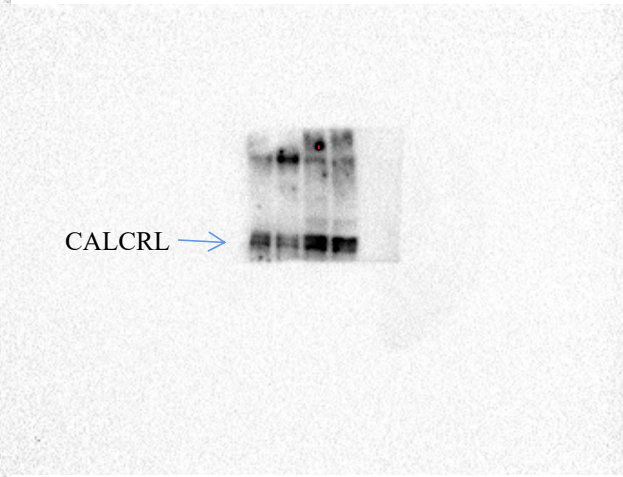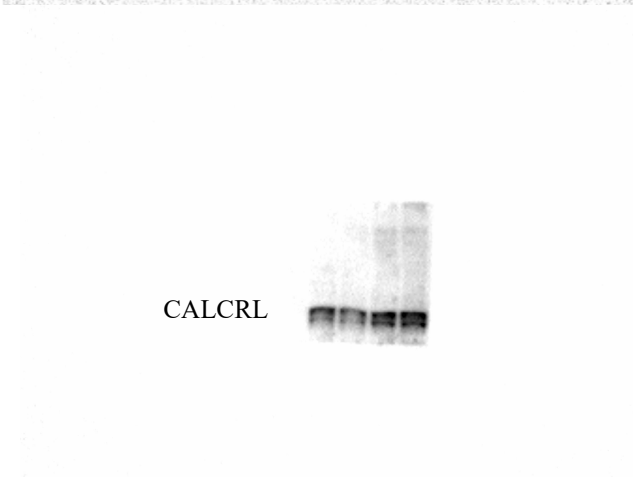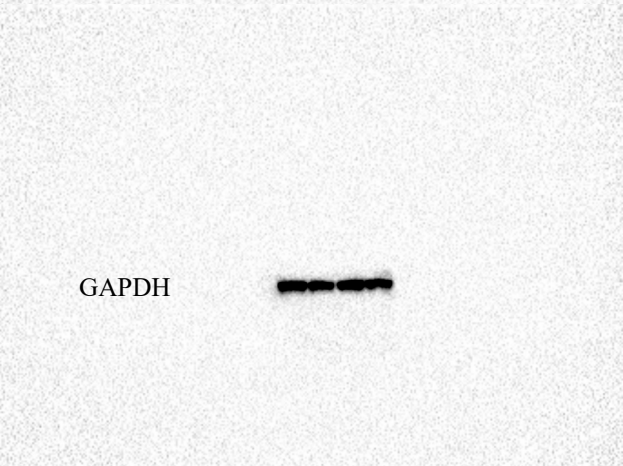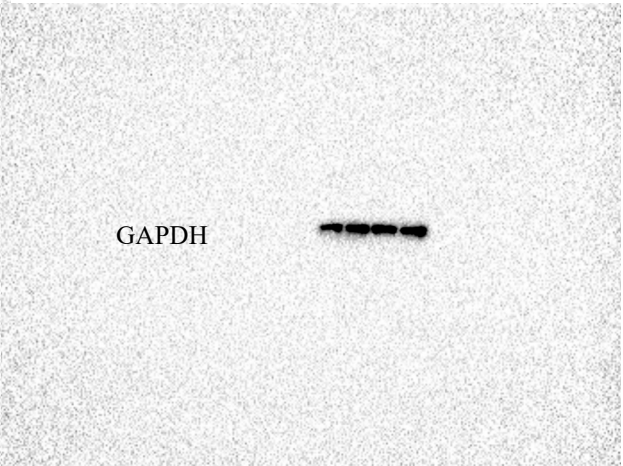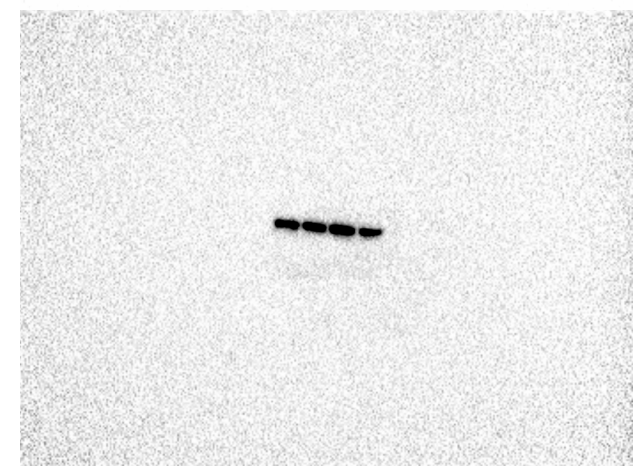

Mice tumour HE: MV4-11 S(Three mice)

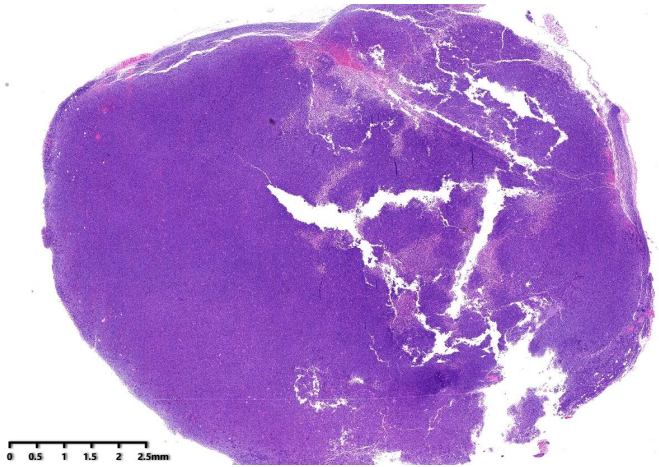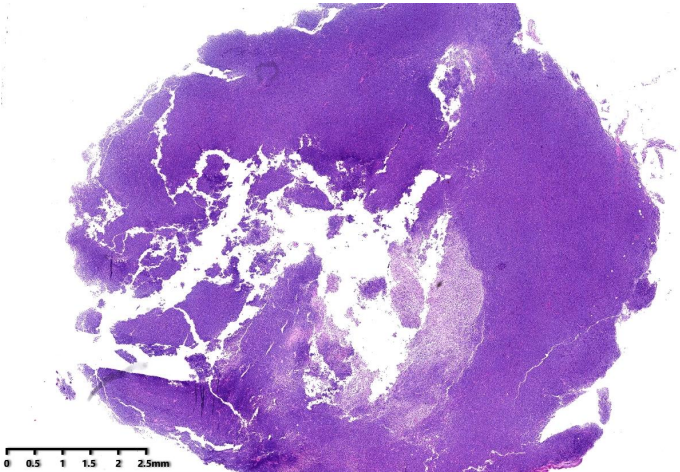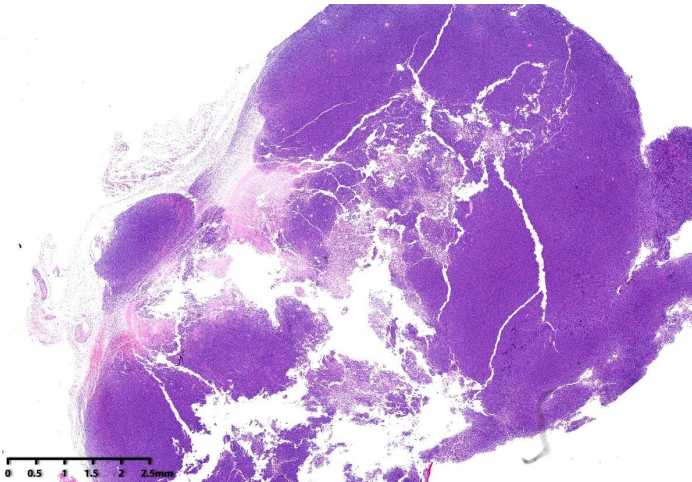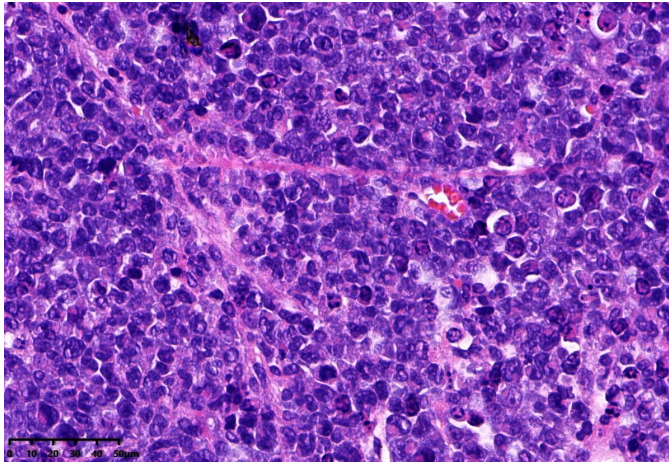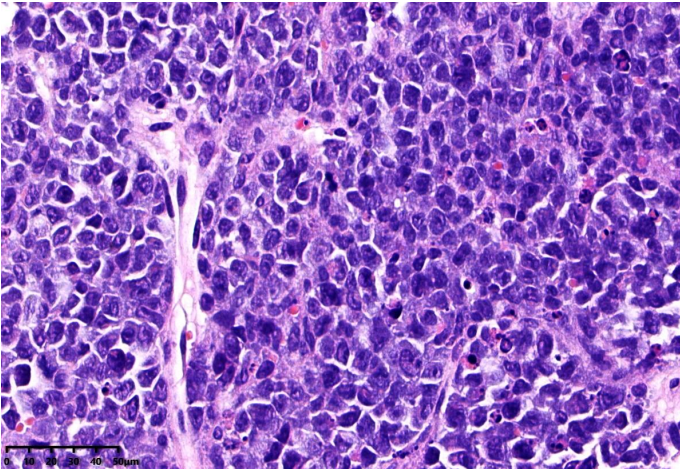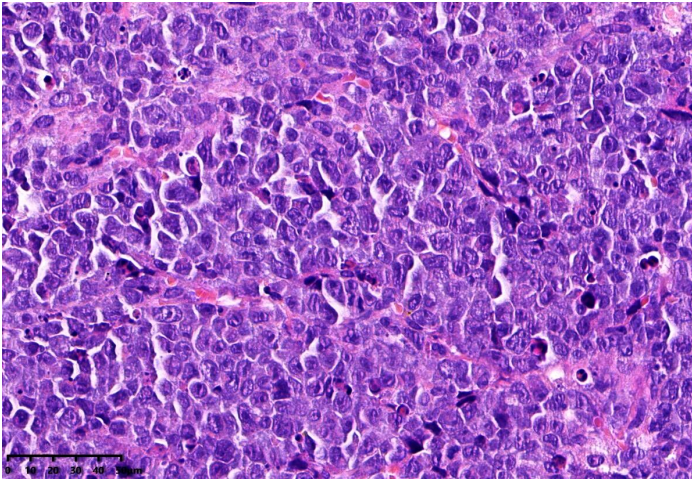

Mice tumour HE: MV4-11 R50(Three mice)

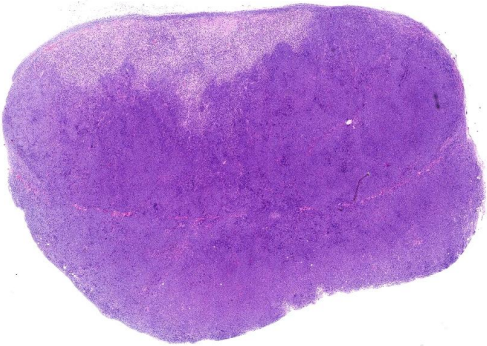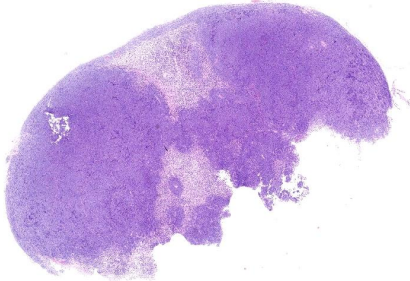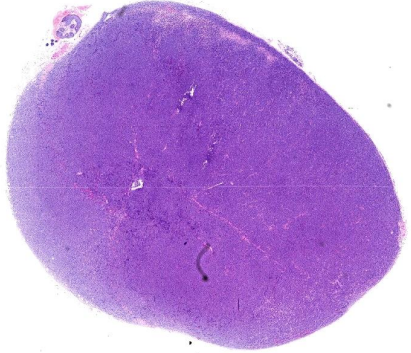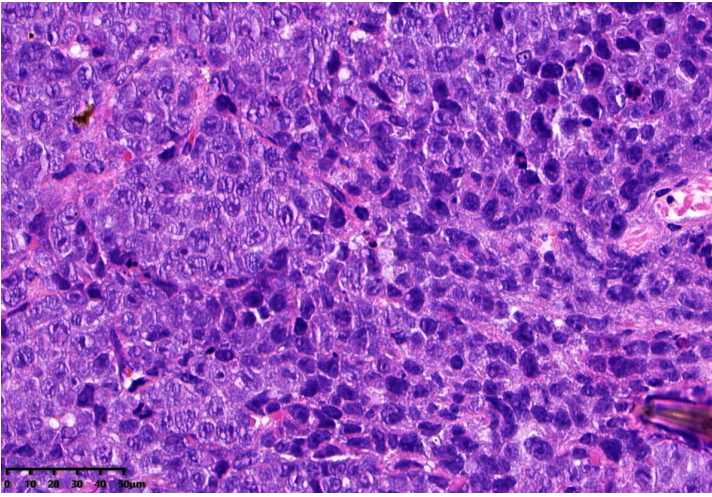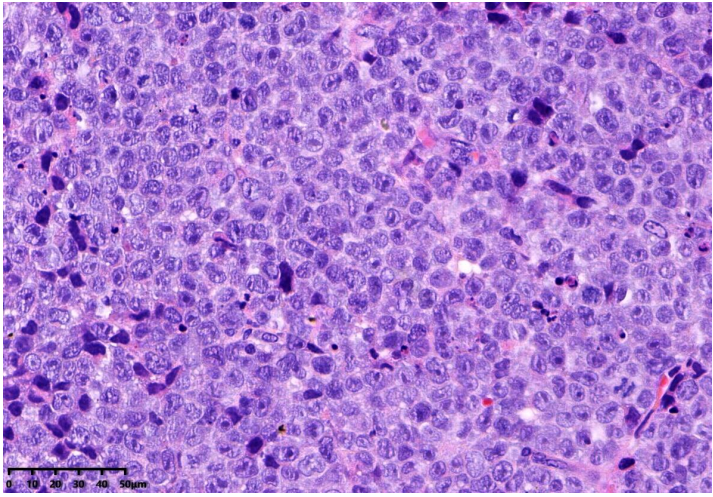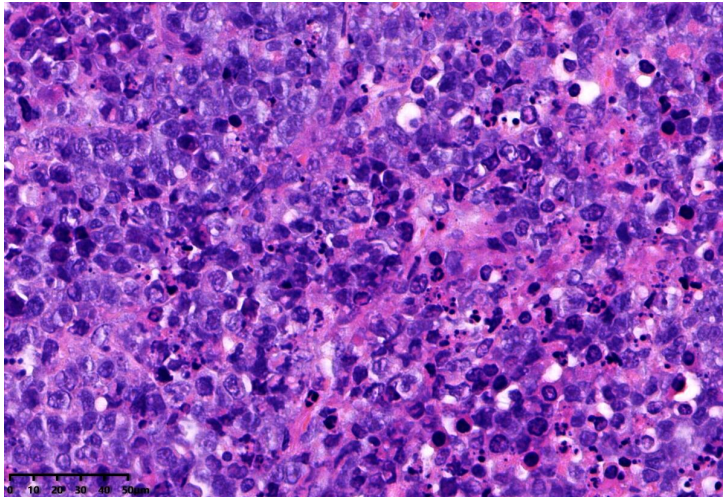

# Part of the Cell Identification Certificate:

## 2. database annotation

Figure 1. STR matching analysis

THP-1:

| EV          | Cell No. | Cell name                | Locus names |            |            |            |            |            |          |           |            |
|-------------|----------|--------------------------|-------------|------------|------------|------------|------------|------------|----------|-----------|------------|
|             |          |                          | D5S818      | D13S317    | D7S820     | D16S539    | VWA        | TH01       | AM       | TPOX      | CSF1PO     |
|             |          | <i>Query (Your Cell)</i> | 11,12       | 13,13      | 10,10      | 11,12      | 16,16      | 8,9,3      | X,Y      | 8,11      | 11,13      |
| 1.00(36/36) | TIB-202  | THP-1                    | [11', '12]  | [13', '13] | [10', '10] | [11', '12] | [16', '16] | [8', '9,3] | [X', 'Y] | [8', '11] | [11', '13] |

**Note:** The STR online match analysis of the test cell against DSMZ database, showing cell number (Cell No.) and cell name.

## 2. database annotation

Figure 1. STR matching analysis

MV4-11:

| EV          | Cell No. | Cell name                | Locus names |         |        |         |       |       |     |      |        |
|-------------|----------|--------------------------|-------------|---------|--------|---------|-------|-------|-----|------|--------|
|             |          |                          | D5S818      | D13S317 | D7S820 | D16S539 | VWA   | TH01  | AM  | TPOX | CSF1PO |
|             |          | <i>Query (Your Cell)</i> | 11,12       | 13,13   | 8,9    | 11,12   | 14,15 | 8,9,3 | X,Y | 8,11 | 10,12  |
| 1.00(36/36) | 102      | MV4-11                   | 11,12       | 13,13   | 8,9    | 11,12   | 14,15 | 8,9,3 | X,Y | 8,11 | 10,12  |
| 1.00(36/36) | CRL-9591 | MV-4-11                  | 11,12       | 13,13   | 8,9    | 11,12   | 14,15 | 8,9,3 | X,Y | 8,11 | 10,12  |

## 2. database annotation

Figure 1. STR matching analysis

MOLM-13:

| EV         | Cell No. | Cell name                | Locus names |            |            |            |            |          |          |          |            |
|------------|----------|--------------------------|-------------|------------|------------|------------|------------|----------|----------|----------|------------|
|            |          |                          | D5S818      | D13S317    | D7S820     | D16S539    | VWA        | TH01     | AM       | TPOX     | CSF1PO     |
|            |          | <i>Query (Your Cell)</i> | 10,11       | 10,11      | 10,12      | 10,11      | 16,17      | 7,7      | X,Y      | 8,8      | 10,12      |
| 1.0(36/36) | 554      | MOLM-13                  | [10', '11]  | [10', '11] | [10', '12] | [10', '11] | [16', '17] | [7', '7] | [X', 'Y] | [8', '8] | [10', '12] |

**Note:** The STR online match analysis of the test cell against DSMZ database, showing cell number (Cell No.) and cell name.

## 2. database annotation

Figure 1. STR matching analysis

KG-1:

| EV          | Cell No. | Cell name                | Locus names |         |        |         |       |      |     |      |        |
|-------------|----------|--------------------------|-------------|---------|--------|---------|-------|------|-----|------|--------|
|             |          |                          | D5S818      | D13S317 | D7S820 | D16S539 | VWA   | TH01 | AM  | TPOX | CSF1PO |
|             |          | <i>Query (Your Cell)</i> | 13,13       | 11,12   | 8,10   | 10,11   | 14,19 | 7,8  | X,Y | 7,9  | 7,7    |
| 1.00(36/36) | 14       | KG-1                     | 13,13       | 11,12   | 8,10   | 10,11   | 14,19 | 7,8  | X,Y | 7,9  | 7,7    |

**Note:** The STR online match analysis of the test cell against DSMZ database, showing cell number (Cell No.) and cell name.

## 2. database annotation

Figure 1. STR matching analysis

KASUMI-1:

| EV          | Cell No. | Cell name                | Locus names |         |        |         |       |      |     |      |        |
|-------------|----------|--------------------------|-------------|---------|--------|---------|-------|------|-----|------|--------|
|             |          |                          | D5S818      | D13S317 | D7S820 | D16S539 | VWA   | TH01 | AM  | TPOX | CSF1PO |
|             |          | <i>Query (Your Cell)</i> | 9,11        | 11,13   | 8,11   | 9,12    | 14,14 | 6,9  | X,X | 8,9  | 10,12  |
| 1.00(36/36) | 220      | KASUMI-1                 | 9,11        | 11,13   | 8,11   | 9,12    | 14,14 | 6,9  | X,X | 8,9  | 10,12  |
| 1.00(36/36) | CRL-2724 | Kasumi-1                 | 9,11        | 11,13   | 8,11   | 9,12    | 14,14 | 6,9  | X,X | 8,9  | 10,12  |

**Note:** The STR online match analysis of the test cell against DSMZ database, showing cell number (Cell No.) and cell name.

## 2. database annotation

Figure 1. STR matching analysis

HL-60:

| EV         | Cell No. | Cell name                | Locus names |           |            |            |            |          |          |           |            |
|------------|----------|--------------------------|-------------|-----------|------------|------------|------------|----------|----------|-----------|------------|
|            |          |                          | D5S818      | D13S317   | D7S820     | D16S539    | VWA        | TH01     | AM       | TPOX      | CSF1PO     |
|            |          | <i>Query (Your Cell)</i> | 12,12       | 8,11      | 11,12      | 11,11      | 16,16      | 7,8      | X,X      | 8,11      | 13,14      |
| 1.0(36/36) | 3        | HL-60                    | [12', '12]  | [8', '11] | [11', '12] | [11', '11] | [16', '16] | [7', '8] | [X', 'X] | [8', '11] | [13', '14] |

**Note:** The STR online match analysis of the test cell against DSMZ database, showing cell number (Cell No.) and cell name.
